1 *Xanthomonas sontii* sp. nov., a non-pathogenic bacterium isolated from healthy basmati rice  
2 (*Oryza sativa*) seeds from India.

3 **Kanika Bansal<sup>1,¶</sup>, Amandeep Kaur<sup>1,¶</sup>, Samriti Midha<sup>1,§</sup>, Sanjeet Kumar<sup>1,#</sup>, Suresh Korpole<sup>1</sup>**  
4 **and Prabhu B. Patil<sup>1,\*</sup>**

5

6 <sup>1</sup>Bacterial Genomics and Evolution Laboratory, CSIR-Institute of Microbial Technology,  
7 Chandigarh, India.

8 <sup>§</sup>Present address: Institute of Infection and Global Health, University of Liverpool, Liverpool, UK.

9 <sup>#</sup>Present address: Department of Archaeogenetics, Max Planck Institute for the Science of Human  
10 History, Jena, Germany.

11

12 <sup>¶</sup>**Equal contribution**

13 <sup>\*</sup> Corresponding author

14

15

16

17 **Running title:** Non-pathogenic *Xanthomonas* from rice plants.

18

19

20

21

22

23

24

25

26 **Data submission:** Whole genome sequences of PPL1, PPL2 and PPL3 strains are submitted to  
27 NCBI with accession numbers NQYO, NQYP, NMPO respectively.

28 Address correspondence to Prabhu B. Patil, [pbpatil@imtech.res.in](mailto:pbpatil@imtech.res.in)

29 **Abstract**

30 Three yellow pigmented, Gram negative, aerobic, rod shaped, motile bacterial strains designated  
31 as PPL1, PPL2 and PPL3 were isolated from healthy basmati rice seeds. Phenotypic, biochemical  
32 and 16S rRNA gene sequence analysis assigned these strains to the genus *Xanthomonas*. The 16S  
33 rRNA gene sequence was having 99.59% similarity with *X. sacchari* CFBP4641<sup>T</sup>. However,  
34 whole genome based phylogenomic analysis revealed that these strains formed a distinct  
35 monophyletic clade with *X. sacchari* CFBP4641<sup>T</sup> as their closest neighbour. Taxonogenomic  
36 studies based on average nucleotide identity (orthoANI) and digital DNA-DNA hybridization  
37 (dDDH) values of these strains with type strains (or representative strains) of different  
38 *Xanthomonas* species including *X. sacchari* showed below recommended threshold values of ANI  
39 (<96%) and dDDH (70%) for species delineation. Furthermore, at the whole genome level, PPL1  
40 and PPL2 were found to be clonal, while PPL3 was not a clonal, but belonging to the same  
41 species. Our *in planta* pathogenicity studies revealed that the strains PPL1, PPL2 and PPL3 are  
42 non-pathogenic to rice plants. Hence, based on the present study, they form a novel lineage and  
43 species associated with rice seeds for which the name *Xanthomonas sontii* sp. nov. is proposed.  
44 The type strain for the *X. sontii* sp. nov. is PPL1<sup>T</sup> (CFBP8688<sup>T</sup> = ICMP23426<sup>T</sup> = MTCC12491<sup>T</sup>)  
45 and strains PPL2 (CFBP8689 = ICMP23427 = MTCC12492) and PPL3 (CFBP8690 = ICMP23428  
46 = MTCC12492) as other strains of the species.

47

48 **Abbreviations:** OrthoANI, Orthologous average nucleotide identity; dDDH, digital DNA-DNA  
49 hybridization; NA, nutrient agar; PSA, peptone sucrose agar; GYCA, glucose yeast extract  
50 calcium carbonate agar; PBS, phosphate buffer saline; TSBA, tryptic soy agar; MCS, MiSeq  
51 control software.

52

53 **Keywords:** *Xanthomonas sontii*, non-pathogenic, healthy basmati rice seeds, orthoANI, dDDH

54

55

56

57

58

59

## 60 **Introduction**

61 *Xanthomonas* is a Gram-negative, yellow-pigmented plant associated bacterium that infects  
62 economically important crops such as rice [1], pomegranate [2], citrus [3], pepper, cabbage [4],  
63 banana [5] etc. It is a complex genus comprising of 33 species (<http://www.bacterio.net/>), which  
64 are further classified into 150 pathovars [6]. In 1997, Vauterin *et al.*, divided these *Xanthomonas*  
65 species into three clusters based on 16S rRNA gene sequence phylogenetic analysis [7]. Besides  
66 main core *Xanthomonas* cluster, *X. albilineans*, *X. hyacinthi*, *X. theicola*, and *X. translucens*  
67 grouped as second cluster, whereas *X. sacchari* formed a distinct phylogenetic cluster. However,  
68 advent of next generation sequencing technology and introduction of robust whole genome based  
69 tools like orthologous average nucleotide identity (orthoANI) and digital DNA-DNA hybridisation  
70 (dDDH) have revolutionized the field of bacterial taxonomy [8-10]. Infact, these methods are  
71 refining comprehensive taxonomic framework, which are essential for developing diagnostic  
72 strategies and understanding host-pathogen relationships in management of crops [8].

73 *Xanthomonas* is emerging as a serious threat for economically important crops. *X. oryzae* pv.  
74 *oryzae*, *X. campestris*, *X. axonopodis* pv. *manihotis* were considered in the top 10 plant pathogenic  
75 bacteria [11]. Among these, *X. oryzae* causes bacterial blight disease to rice plants resulting in 30-  
76 50% decrease in rice yield every year [12], [13], [14]. Other than pathogenic *Xanthomonas* strains  
77 that cause disease in rice plants, some of the non-pathogenic *Xanthomonas* strains have also been  
78 identified from rice plants [15], [16]. Most of these non-pathogenic strains reported were largely  
79 characterized based on phenotypic and biochemical analysis providing limited information.

80 In the present study, we report isolation and characterization of three creamish-yellow pigmented  
81 bacterial strains from healthy basmati rice (*Oryza sativa*) seeds. Genome based polyphasic  
82 analysis supported with pathogenicity tests revealed that these strains are non-pathogenic to rice  
83 and belong to a novel species, for which we propose *Xanthomonas sontii* sp. nov. These non-  
84 pathogenic stains are widely over-looked due to their less economic importance. However, these  
85 non-pathogenic isolates were isolated from rice plant, where their pathogenic counterparts (*X.*  
86 *oryzae*) causes infection and are devastating worldwide. Hence, identification and detailed  
87 analysis of these non-pathogenic strains can provide important insights into the lifestyle adapted  
88 by these strains and virulence mechanisms of their pathogenic counterparts.

89

## 90 **Materials and methods**

### 91 **Bacterial strain isolation and culture conditions**

92 Strains were isolated from surface sterilized healthy rice seeds (Pusa basmati 1121 variety) that  
93 were collected from Fazilka, Punjab, India (30.4036° N, 74.0280° E). For bacterial strain isolation,  
94 surface sterilized seeds were partially crushed in 0.85 % NaCl (normal saline) using sterile mortar  
95 and pestle. The mixture was then suspended in 50 ml of solution [17]. The solution was incubated  
96 for 2 h at 28°C and serial dilutions performed up to 10<sup>-6</sup> and different dilutions (100µl) were  
97 plated on media like nutrient agar (NA), peptone sucrose agar (PSA) and glucose yeast extract  
98 calcium carbonate agar (GYCA). Plates were incubated at 28°C up to 6 days. Bacterial colonies  
99 isolated were grown and maintained on PSA medium.

### 100 **Phenotypic and biochemical characterisation**

101 We analysed the morphology of strains by observing presence of flagella using transmission  
102 electron microscopy. PPL1 strain was grown in nutrient broth and incubated at 28°C for 20 h.  
103 Subsequently, cells were harvested by centrifugation at 2000 rpm for 10 minutes. Cell pellet  
104 was washed twice with phosphate buffer saline (1X PBS) and finally resuspended in PBS.  
105 Bacterial suspension was placed on carbon-coated copper grid (300 mesh, Nisshin EM Co., Ltd.)  
106 for 15 minutes. The grid was then negatively stained for 30 seconds with 2% phosphotungstic  
107 acid, dried and examined under JEM 2100 transmission electron microscope (JEOL, Tokyo,  
108 Japan) operating at 200 kV.

109 Further, biochemical characterization such as carbohydrate utilization, acid production and various  
110 enzymatic activities were performed using OMNILOG GEN III system (BIOLOG) according to  
111 manufacturer's instructions.

### 112 **DNA extraction, genome sequencing, assembly and annotation**

113 Genomic DNA extraction was carried out using ZR Fungal/Bacterial DNA MiniPrep kit (Zymo  
114 Research, Irvine, CA, USA). Qualitative assessment of DNA was performed using NanoDrop  
115 1000 (Thermo Fisher Scientific, Wilmington, DE, USA) and agarose gel electrophoresis.  
116 Quantitative test was performed using Qubit 2.0 fluorometer (Life Technologies). Nextera XT  
117 sample preparation kits (Illumina, Inc., San Diego, CA, USA) were used to prepare Illumina  
118 paired-end sequencing libraries (250 x 2 read length) with dual indexing adapters. In-house  
119 sequencing of the Illumina libraries was carried out on Illumina MiSeq platform (Illumina, Inc.,  
120 San Diego, CA, USA). Adapter trimming was performed automatically by MiSeq control software  
121 (MCS), and remaining adapters were detected by NCBI server and were removed by manual

122 trimming. Sequencing reads were *de novo* assembled into high quality draft genome on CLC  
123 Genomics Workbench v7.5 (CLC bio, Aarhus, Denmark) using default settings. Genome  
124 annotation was performed by NCBI PGAP pipeline  
125 ([http://www.ncbi.nlm.nih.gov/genome/annotation\\_prok](http://www.ncbi.nlm.nih.gov/genome/annotation_prok)).

### 126 **Phylogenomic and taxonogenomic analysis:**

127 The 16S rRNA sequence of the strains was fetched from genome sequence and its comparison  
128 with validly published reference bacteria was carried out using Eztaxon  
129 (<https://www.ezbiocloud.net/>). Core genome tree was constructed using PhyML[18]. Core genome  
130 alignment was obtained using Roary v3.11.2 [19] with identity cutoff 60%. The core gene  
131 alignment was converted into phylip format using SeaView v4.4.2-1 [20] and then, newick tree  
132 was obtained using PhyML. *Stenotrophomonas maltophilia* ATCC13637 was used as an outgroup.  
133 Taxonogenomic analysis of all type strains or representative strains of *Xanthomonas* was  
134 performed using OrthoANI v1.2 [21] values calculated by using USEARCH v5.2.32 [22] and  
135 dDDH were calculated using Web tool GGDC 2.0 (<http://ggdc.dsmz.de/distcalc2.php>)

### 136 ***In planta* pathogenicity test**

137 PPL1, PPL2, PPL3 and BXO1 were grown to saturation in PSA media and inoculated on 30 days  
138 old rice plant (PUSA-basmati 1121) variety. Inoculation was performed by dipping scissors in  
139 bacterial culture and clipping tips of rice leaves. After 14 days, infection was assessed by  
140 measuring length of lesions on leaves. Here, BXO1 was positive control and PBS was used as  
141 negative control. Pathogenicity data of each isolate was obtained from 10 inoculated leaves based  
142 on two independent experiments.

### 143 **Results and discussion:**

#### 144 **Phenotypic and biochemical characterisation of PPL1, PPL2 and PPL3**

145 All strains PPL1, PPL2 and PPL3 were isolated from glucose yeast extract calcium carbonate agar  
146 (GYCA) media after 24 h of incubation at 28 °C. Colonies appeared as yellow, round, smooth,  
147 convex and circular. All strains were Gram-negative, rod shaped bacteria with monopolar flagella,  
148 as shown in figure 1.

149 Major biochemical characteristics of PPL1, PPL2 and PPL3 strains along with their closest  
150 neighbour *X. sacchari* NCPPB 4341<sup>T</sup> were determined using BIOLOG GEN III MICROPLATE™  
151 and compared with *X. albilineans* LMG 494<sup>T</sup> [23] (table 1). All three strains grew well between  
152 20°C to 37°C with optimum temperature 28°C. No growth observed at 50°C. Further,  
153 strains were able to grow at pH 6.0 and up to 4% NaCl whereas no growth observed at pH 5.0

154 and 8% NaCl. In BIOLOG results, all strains PPL1, PPL2 and PPL3 were positive for utilization  
155 of D-maltose, D-trehalose, D-cellobiose, gentiobiose, sucrose, D-turanose,  $\alpha$ -D-lactose, D-  
156 melibiose,  $\beta$ -methyl-D-glucoside, D-salicin, N-acetyl-D-glucosamine,  $\alpha$ -D-glucose, D-mannose,  
157 D-fructose, D-galactose, L-fucose, glycerol, gelatin, L-alanine, L-aspartic Acid, L-glutamic Acid,  
158 pectin, quinic acid, methyl pyruvate, L-lactic acid, citric acid, L-malic acid, tween 40, propionic  
159 acid, acetic acid. Strains were resistant to rifamycin SV, lincomycin, vancomycin, tetrazolium  
160 violet, tetrazolium blue, lithium chloride. Overall, biochemical characteristics of PPL1, PPL2 and  
161 PPL3 strains were in accordance with its close relative *X. sacchari* NCPPB 4341<sup>T</sup>. Biochemical  
162 characteristics of *X. albilineans* LMG 494<sup>T</sup> relative species of *X. sacchari* was taken from  
163 literature and included in table 1 [23].

#### 164 **Pathogenicity test:**

165 Pathogenicity was checked by *in planta* inoculation studies. After 14 days of infection, BXO1  
166 infected leaves showed approx. 13 cm lesion while, PPL1, PPL2, PPL3 and negative control did  
167 not show significant infection (approx. 0.5cm lesion) when compared with BXO1 (figure 2).  
168 Hence, this clearly reveals that PPL1, PPL2, PPL3 are non-pathogenic to the host.

#### 169 **In-house whole genome sequencing and assembly**

170 Whole genome sequencing of PPL1, PPL2 and PPL3 strains were carried out using in-house  
171 Illumina MiSeq platform. The genome size of all strains was approx. 5Mb with genome coverage  
172 ranging from 78x to 109x. Assembly statistics for all the strains are given in table 2.

#### 173 **Phylogenomic analysis:**

174 Core genome tree was constructed using PhyML. For analysis, total 36 species were used  
175 (including 32 type and representative strains of different *Xanthomonas* species, along with three  
176 strains PPL1, PPL2 and PPL3 isolated in this study). *Stenotrophomonas maltophilia* ATCC13637  
177 was used as an outgroup. Out of 36 species, 27 were clubbed in one group as previously reported  
178 [7] including *X. pisi*, *X. vesicatoria*, *X. citri*, *X. codiae*, *X. fragariae*, *X. bromi*, *X. campestris*, *X.*  
179 *dyei*, *X. phaseoli*, *X. hortorum*, *X. arboricola*, *X. cynarae*, *X. cucurbitae*, *X. vasicola*, *X.*  
180 *floridensis*, *X. perforans*, *X. euvesicatoria*, *X. maliensis*, *X. gardneri*, *X. axonopodis*, *X. cassavae*,  
181 *X. nasturtii*, *X. alfalfae*, *X. prunicola*, *X. oryzae*, *X. melonis*, and *X. populi*. Whereas 8 strains  
182 fallen in second group including PPL1, PPL2, PPL3, *X. sacchari*, *X. theicola*, *X. translucens*, *X.*  
183 *hyacinthi*, *X. albilineans*. PPL1<sup>T</sup>, PPL2 and PPL3 formed a monophyletic clade distinguishing  
184 them from other strains. However, *X. sacchari* is the closest neighbour of these strains. Amongst  
185 PPL strains, PPL1 and PPL2 are distinct from PPL3 with 100 bootstrap value (figure 3).

186 **Genome based taxonogenomic status:**

187 The orthoANI (figure 4) and dDDH values (table 3) of PPL1, PPL2 and PPL3 with type and  
188 representative strains of genus *Xanthomonas* species were below the cut-off for species  
189 delineation. These strains have *X. sacchari* as their closest relative with ANI values of ~  
190 94%, establishing novel species status of these strains. All the PPL1, PPL2 and PPL3 strains  
191 showed dDDH values of around 55% with *X. sacchari* and less than 35% with other species of the  
192 genus *Xanthomonas*. Interestingly, at the whole genome level, PPL1 and PPL2 strains were found  
193 to be clonal (ANI- 99.95%, dDDH- 99.5%) whereas, PPL3 was not clonal (ANI- 97.6%, dDDH-  
194 ~78%) however, it belonged to the same species.

195 **Description of *Xanthomonas sontii* sp. nov.**

196 *Xanthomonas sontii* (N.L. masc. gen. n. *sontii* named in honour of Ramesh V. Sonti, a renowned  
197 Indian bacterial and plant molecular geneticist).

198 Cells are Gram-negative, aerobic, rod shape, motile and form yellow, round, smooth, convex and  
199 circular colonies after 24hrs. Cells can grow on nutrient agar (NA), peptone sucrose agar (PSA)  
200 and glucose yeast extract calcium carbonate agar (GYCA) media. Optimum temperature for  
201 growth is 28 °C. They are able to utilize of D-maltose, D-trehalose, D-cellobiose, gentiobiose,  
202 sucrose, D-turanose,  $\alpha$ -D-lactose, D-melibiose,  $\beta$ -methyl-D-glucoside, D-salicin, N-acetyl-D-  
203 glucosamine,  $\alpha$ -D-glucose, D-mannose, D-fructose, D-galactose, L-fucose, glycerol, gelatin, L-  
204 alanine, L-aspartic acid, L-glutamic acid, pectin, quinic acid, methyl pyruvate, L-lactic acid, citric  
205 acid, L-malic acid, , tween 40, propionic acid, acetic acid. Strains were able to grow at pH 6.0 and  
206 resistant to 1% NaCl, 1% sodium lactate, and antibiotics like rifamycin SV, lincomycin,  
207 vancomycin, tetrazolium violet, tetrazolium blue, lithium chloride. Taxonogenomic and  
208 phylogenomic analysis revealed distinctness of these species with orthoANI and dDDH values  
209 below established cutoff values i.e. 96% for ANI and 70% for dDDH. Core genome tree analysis  
210 showed separate grouping PPL1, PPL2 and PPL3 from other *Xanthomonas* strains. Further,  
211 amongst PPL strains PPL3 differ at clone level forming distinct clade than PPL1 and PPL2.  
212 Therefore, we propose PPL1, PPL2 and PPL3 as novel species *X. sontii* of the genus *Xanthomonas*  
213 with PPL1 as type strain PPL1<sup>T</sup> (CFBP8688<sup>T</sup> = ICMP23426<sup>T</sup> = MTCC12491<sup>T</sup>).

214

215

216



217

## 218 **Acknowledgements**

219 We thank Randeep sharma for providing technical assistance with electron microscopy. All the  
220 work in present study was supported by “(MICRA) – Mega-genomic insights into co-evolution of  
221 rice and its Microbiome” (MLP0020).

## 222 **References**

- 223 1. NIÑO-LIU, D.O., P.C. Ronald, and A.J. Bogdanove, *Xanthomonas oryzae pathovars: model*  
224 *pathogens of a model crop*. Molecular Plant Pathology, 2006. **7**(5): p. 303-324.
- 225 2. Petersen, Y., et al., *Detection of Xanthomonas axonopodis pv. punicae causing bacterial blight on*  
226 *pomegranate in South Africa*. Australasian Plant Pathology, 2010. **39**(6): p. 544-546.
- 227 3. Brunings, A.M. and D.W. Gabriel, *Xanthomonas citri: breaking the surface*. Molecular Plant  
228 Pathology, 2003. **4**(3): p. 141-157.
- 229 4. Vicente, J.G., et al., *Identification and origin of Xanthomonas campestris pv. campestris races and*  
230 *related pathovars*. Phytopathology, 2001. **91**(5): p. 492-499.
- 231 5. Tushemereirwe, W., et al., *First report of Xanthomonas campestris pv. musacearum on banana in*  
232 *Uganda*. Plant Pathology, 2004. **53**(6): p. 802-802.
- 233 6. Bull, C., et al., *List of new names of plant pathogenic bacteria (2011-2012)*. Journal of Plant  
234 Pathology, 2014. **96**(2): p. 223-226.
- 235 7. Hauben, L., et al., *Comparison of 16S ribosomal DNA sequences of all Xanthomonas species*.  
236 International Journal of Systematic and Evolutionary Microbiology, 1997. **47**(2): p. 328-335.
- 237 8. Loman, N.J. and M.J. Pallen, *Twenty years of bacterial genome sequencing*. Nature Reviews  
238 Microbiology, 2015. **13**(12): p. 787-795.
- 239 9. Auch, A.F., et al., *Digital DNA-DNA hybridization for microbial species delineation by means of*  
240 *genome-to-genome sequence comparison*. Standards in genomic sciences, 2010. **2**(1): p. 117.
- 241 10. Richter, M. and R. Rosselló-Móra, *Shifting the genomic gold standard for the prokaryotic species*  
242 *definition*. Proceedings of the National Academy of Sciences, 2009. **106**(45): p. 19126-19131.
- 243 11. Mansfield, J., et al., *Top 10 plant pathogenic bacteria in molecular plant pathology*. Molecular  
244 plant pathology, 2012. **13**(6): p. 614-629.
- 245 12. Noh, T.-H., et al., *Effects of bacterial leaf blight occurrence on rice yield and grain quality in*  
246 *different rice growth stage*. Research in Plant Disease, 2007. **13**(1): p. 20-23.
- 247 13. Shaheen, R., et al., *INVESTIGATION OF BACTERIAL LEAF BLIGHT OF RICE THROUGH VARIOUS*  
248 *DETECTION TOOLS AND ITS IMPACT ON CROP YIELD IN PUNJAB, PAKISTAN*. PAKISTAN JOURNAL  
249 OF BOTANY, 2019. **51**(1): p. 307-312.
- 250 14. Sharma, P., L. Bora, and K. Puzari, *Review on bacterial blight of rice caused by Xanthomonas*  
251 *oryzae pv. oryzae: different management approaches and role of Pseudomonas fluorescens as a*  
252 *potential biocontrol agent*. Int J Curr MicrobiolApp Sci, 2017. **6**: p. 982-1005.
- 253 15. Vauterin, L., et al., *Identification of non-pathogenic Xanthomonas strains associated with plants*.  
254 Systematic and applied microbiology, 1996. **19**(1): p. 96-105.
- 255 16. Triplett, L.R., et al., *Characterization of a novel clade of Xanthomonas isolated from rice leaves in*  
256 *Mali and proposal of Xanthomonas maliensis sp. nov.* Antonie Van Leeuwenhoek, 2015. **107**(4): p.  
257 869-881.
- 258 17. Cottyn, B., et al., *Bacterial populations associated with rice seed in the tropical environment*.  
259 Phytopathology, 2001. **91**(3): p. 282-292.
- 260 18. Guindon, S., et al., *New algorithms and methods to estimate maximum-likelihood phylogenies:*  
261 *assessing the performance of PhyML 3.0*. Systematic biology, 2010. **59**(3): p. 307-321.



- 262 19. Page, A.J., et al., *Roary: rapid large-scale prokaryote pan genome analysis*. *Bioinformatics*, 2015.  
263 **31**(22): p. 3691-3693.
- 264 20. Gouy, M., S. Guindon, and O. Gascuel, *SeaView version 4: a multiplatform graphical user interface*  
265 *for sequence alignment and phylogenetic tree building*. *Molecular biology and evolution*, 2009.  
266 **27**(2): p. 221-224.
- 267 21. Lee, I., et al., *OrthoANI: an improved algorithm and software for calculating average nucleotide*  
268 *identity*. *International journal of systematic and evolutionary microbiology*, 2016. **66**(2): p. 1100-  
269 1103.
- 270 22. Edgar, R.C., *Search and clustering orders of magnitude faster than BLAST*. *Bioinformatics*, 2010.  
271 **26**(19): p. 2460-2461.
- 272 23. VAUTERIN, L., et al., *Reclassification of Xanthomonas*. *International Journal of Systematic and*  
273 *Evolutionary Microbiology*, 1995. **45**(3): p. 472-489.

274

275

## 276 **Figure legends**

277 **Figure 1:** Transmission electron microscopy image of PPL1<sup>T</sup> strain with monopolar flagella.

278 **Figure 2:** *In planta* infected leaves of rice (**Pusa Basmati 1121**) (a) leaves showing symptoms of  
279 disease after 14 dpi (b) lesion length measured in cm for positive (BXO1), negative (PBS) control  
280 and PPL strains. Error bar indicates standard deviation of readings from 10 inoculated leaves and  
281 from two independent experiments.

282 **Figure 3:** Whole genome based phylogeny considering all type strains and representative strains  
283 of genus *Xanthomonas*. The scale bar shows the number of nucleotide substitution per site. PPL1<sup>T</sup>,  
284 PPL2 and PPL3 strains (highlighted in coloured box) formed a distinct cluster. *S. maltophilia*  
285 ATCC1637 was used as an outgroup.

286 **Figure 4:** Heat map showing ANI strains values of PPL1<sup>T</sup>, PPL2 and PPL3 with type and  
287 representative strains of the genus *Xanthomonas*.

288

289

290

291

292

293

294

295

296 **Tables**

297 **Table 1:** Comparison of biochemical characteristics of PPL1<sup>T</sup>, PPL2, PPL3, and their closest  
 298 neighbor *X. sacchari* NCPPB 4341<sup>T</sup>. Symbols represents; + : positive, - : negative, +/- :  
 299 borderline, § : *X. albilineans* LMG 494<sup>T</sup> strain characteristics already reported in [23], NA : data  
 300 not available in literature.

|                          | PPL1 <sup>T</sup> | PPL2 | PPL3 | <i>X. sacchari</i><br>NCPPB 4341 <sup>T</sup> | <i>X. albilineans</i> <sup>§</sup><br>LMG 494 <sup>T</sup> |
|--------------------------|-------------------|------|------|-----------------------------------------------|------------------------------------------------------------|
| Dextrin                  | +                 | +    | +    | +                                             | -                                                          |
| D-Maltose                | +                 | +    | +    | +                                             | -                                                          |
| D-Trehalose              | +                 | +    | +    | +                                             | -                                                          |
| D-Cellobiose             | +                 | +    | +    | +                                             | +                                                          |
| Gentiobiose              | +                 | +    | +    | +                                             | -                                                          |
| Sucrose                  | +                 | +    | +    | +                                             | +                                                          |
| D-Turanose               | +                 | +    | +    | +                                             | -                                                          |
| pH 6                     | +                 | +    | +    | +                                             | NA                                                         |
| D-Raffinose              | -                 | -    | -    | -                                             | -                                                          |
| α-D-Lactose              | +                 | +    | +    | +                                             | -                                                          |
| D-Melibiose              | +                 | +    | +    | +                                             | -                                                          |
| β-Methyl-D-Glucoside     | +                 | +    | +    | +                                             | -                                                          |
| D-Salicin                | +                 | +    | +    | +                                             | NA                                                         |
| N-Acetyl-D-Glucosamine   | +                 | +    | +    | +                                             | +                                                          |
| N-Acetyl-β-D-Mannosamine | -                 | -    | -    | +/-                                           | *                                                          |
| N-Acetyl-D-Galactosamine | +                 | +    | +/-  | +/-                                           | -                                                          |
| N-Acetyl Neuraminic Acid | -                 | -    | -    | -                                             | NA                                                         |
| 1% NaCl                  | +                 | +    | +    | +                                             | NA                                                         |
| 4% NaCl                  | +                 | +    | +    | +                                             | NA                                                         |
| 8% NaCl                  | -                 | -    | -    | -                                             | NA                                                         |
| α-D-Glucose              | +                 | +    | +    | +                                             | +                                                          |
| D-Mannose                | +                 | +    | +    | +                                             | +                                                          |
| D-Fructose               | +                 | +    | +    | +                                             | +                                                          |
| D-Galactose              | +                 | +    | +    | +                                             | -                                                          |
| L-Fucose                 | +                 | +    | +    | +                                             | +                                                          |
| L-Rhamnose               | -                 | -    | -    | +/-                                           | -                                                          |
| Inosine                  | -                 | -    | -    | -                                             | -                                                          |
| 1% Sodium Lactate        | +                 | +    | -    | +                                             | NA                                                         |
| Fusidic Acid             | -                 | -    | -    | -                                             | NA                                                         |
| D-Sorbitol               | -                 | -    | -    | -                                             | -                                                          |
| D-Mannitol               | -                 | -    | -    | -                                             | -                                                          |
| D-Arabitol               | -                 | -    | -    | -                                             | -                                                          |
| Glycerol                 | +                 | +    | +/-  | +                                             | -                                                          |
| D-Aspartic Acid          | -                 | -    | -    | -                                             | NA                                                         |

| Strain                      |     |   | PPL1 <sup>T</sup> | PPL2 | PPL3 |
|-----------------------------|-----|---|-------------------|------|------|
| Rifamycin SV                | +   | + | +                 | +    | NA   |
| Minocycline                 | -   | - | -                 | -    | NA   |
| Gelatin                     | +   | + | +                 | +    | NA   |
| L-Alanine                   | +   | + | +                 | +    | -    |
| L-Arginine                  | -   | - | -                 | +/-  | NA   |
| L-Aspartic Acid             | +   | + | +                 | +    | -    |
| L-Glutamic Acid             | +   | + | +                 | +    | +/-  |
| L-Pyroglutamic acid         | -   | - | -                 | -    | -    |
| Lincomycin                  | +   | + | +                 | +    | NA   |
| Pectin                      | +   | + | +                 | +    | NA   |
| D-Gluconic Acid             | -   | - | -                 | -    | -    |
| Quinic Acid                 | +   | + | +                 | +    | -    |
| D-Saccharic Acid            | -   | - | -                 | -    | -    |
| Vancomycin                  | +   | + | +                 | +    | NA   |
| Tetrazolium Violet          | +   | + | +                 | +    | NA   |
| Tetrazolium blue            | +   | + | +                 | +    | NA   |
| p-Hydroxy Phenylacetic acid | -   | - | -                 | +    | -    |
| Methyl Pyruvate             | +   | + | +/-               | +    | +    |
| D-Lactic Acid Methyl Ester  | -   | - | -                 | -    | NA   |
| L-Lactic Acid               | +   | + | +                 | +    | +    |
| Citric Acid                 | +   | + | +                 | +    | -    |
| L-Malic Acid                | +   | + | +                 | +    | NA   |
| Bromo-Succinic acid         | +   | + | +                 | +    | -    |
| Lithium Chloride            | +   | + | +                 | +    | NA   |
| Tween 40                    | +   | + | +                 | +    | -    |
| Propionic Acid              | +   | + | +                 | +    | -    |
| Acetic Acid                 | +   | + | +                 | +    | -    |
| Aztreonam                   | +/- | + | +                 | +    | NA   |

301

302 **Table 2:** Genome assembly statistics of PPL1<sup>T</sup>, PPL2 and PPL3 strains.

303

| S. N. | Strain Name       | Completeness/<br>Contamination | Fold (X) | N50 (kb) | Contigs | Genome Size | GC (%) | CDS  | rRN A+<br>tRNA | Isolation source | Accessio n No. |
|-------|-------------------|--------------------------------|----------|----------|---------|-------------|--------|------|----------------|------------------|----------------|
| 1     | PPL1 <sup>T</sup> | 96.31/0.22                     | 78       | 32.9     | 332     | 4.8         | 69     | 4149 | 3+51           | Rice seeds       | NQYO           |
| 2     | PPL2              | 95.79/0.07                     | 109      | 48.1     | 200     | 4.9         | 68.8   | 4105 | 2+50           | Rice seeds       | NQYP           |
| 3     | PPL3              | 98.56/0.55                     | 80       | 40.3     | 231     | 4.8         | 68.8   | 4106 | 3+52           | Rice seeds       | NMPO           |

304

305 **Table 3:** The dDDH values of strains PPL1<sup>T</sup>, PPL2 and PPL3 with other *Xanthomonas* strains.

|     |                                              |      |      |      |
|-----|----------------------------------------------|------|------|------|
| 306 | <i>X. theicola</i> CFBP4691                  | 32.4 | 32.4 | 32.5 |
|     | <i>X. translucens</i> DSM18974 <sup>T</sup>  | 33   | 33   | 33   |
| 307 | <i>X. hyacinthi</i> CFBP1156                 | 33.6 | 33.6 | 33.4 |
|     | <i>X. albilineans</i> CFBP2523 <sup>T</sup>  | 28.5 | 28.4 | 28.4 |
| 308 | <i>X. sacchari</i> CFBP4641 <sup>T</sup>     | 55.1 | 55.3 | 55.2 |
| 309 | PPL3                                         | 78.2 | 78.7 | 100  |
|     | PPL1 <sup>T</sup>                            | 100  | 99.5 | 78.2 |
|     | PPL2                                         | 99.5 | 100  | 78.7 |
|     | <i>X. maliensis</i> LMG27592 <sup>T</sup>    | 23.1 | 23.1 | 23.1 |
|     | <i>X. campestris</i> ATCC33913 <sup>T</sup>  | 23   | 23   | 23.1 |
|     | <i>X. cucurbitae</i> CFBP2542 <sup>T</sup>   | 23.2 | 23.2 | 23   |
|     | <i>X. cassavae</i> CFBP4642 <sup>T</sup>     | 23.4 | 23.4 | 23.3 |
|     | <i>X. floridensis</i> WHRI8848 <sup>T</sup>  | 23.4 | 23.4 | 23.4 |
|     | <i>X. codiae</i> CFBP4690                    | 23.6 | 23.6 | 23.7 |
|     | <i>X. melonis</i> CFBP4644                   | 23.4 | 23.4 | 23.4 |
|     | <i>X. vesicatoria</i> LMG911 <sup>T</sup>    | 22.9 | 22.8 | 22.8 |
|     | <i>X. pisi</i> DSM18256                      | 23.1 | 23   | 23.3 |
|     | <i>X. dyei</i> CFBP7245 <sup>T</sup>         | 22.9 | 22.9 | 23   |
|     | <i>X. fragariae</i> PD885                    | 22.5 | 22.4 | 22.4 |
|     | <i>X. arboricola</i> CFBP2528 <sup>T</sup>   | 23.6 | 23.5 | 23.4 |
|     | <i>X. populi</i> CFBP1817 <sup>T</sup>       | 22.7 | 22.6 | 22.4 |
|     | <i>X. hortorum</i> MO81                      | 22.9 | 22.8 | 22.8 |
|     | <i>X. cynarae</i> CFBP4188 <sup>T</sup>      | 23   | 23   | 22.9 |
|     | <i>X. gardneri</i> ICMP7383                  | 23.1 | 23   | 22.9 |
|     | <i>X. nasturtii</i> WHRI8853 <sup>T</sup>    | 23.1 | 23.1 | 23.1 |
|     | <i>X. bromi</i> CFBP1976 <sup>T</sup>        | 23   | 23   | 23   |
|     | <i>X. prunicola</i> CFBP8353 <sup>T</sup>    | 22.9 | 22.9 | 22.9 |
|     | <i>X. axonopodis</i> DSM3585 <sup>T</sup>    | 23.1 | 23.1 | 23   |
|     | <i>X. citri</i> LMG9322 <sup>T</sup>         | 23.3 | 23.3 | 23.3 |
|     | <i>X. phaseoli</i> CFBP412                   | 23   | 23.1 | 23   |
|     | <i>X. perforans</i> 91-118                   | 23   | 23   | 23   |
|     | <i>X. euvesicatoria</i> LMG27970             | 23.6 | 23.6 | 23.6 |
|     | <i>X. alfalfae</i> LMG495 <sup>T</sup>       | 23.4 | 23.4 | 23.3 |
|     | <i>X. vasicola</i> NCPPB2417 <sup>T</sup>    | 22.8 | 22.8 | 22.9 |
|     | <i>X. oryzae</i> ATCC35933 <sup>T</sup>      | 22.9 | 22.8 | 23   |
|     | <i>S. maltophilia</i> ATCC13637 <sup>T</sup> | 22.9 | 22.9 | 22.9 |

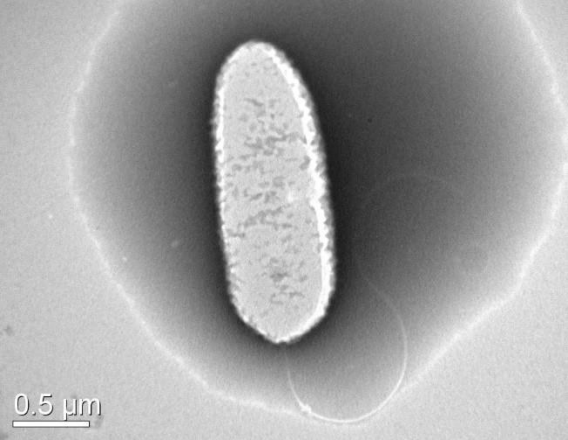

0.5 μm

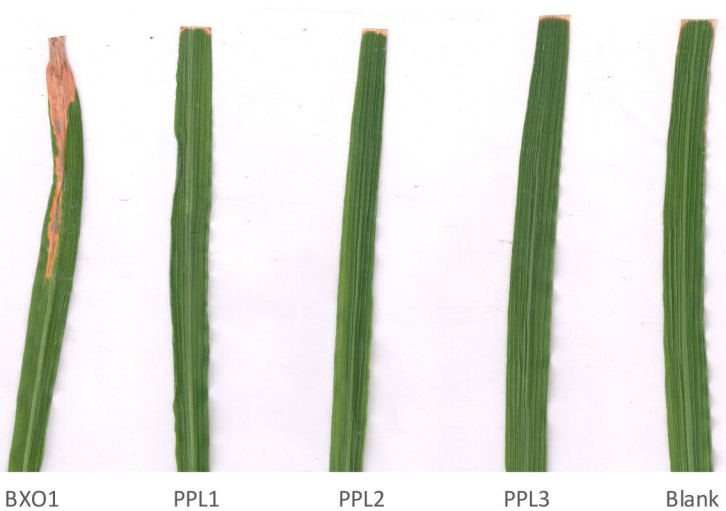

(A)

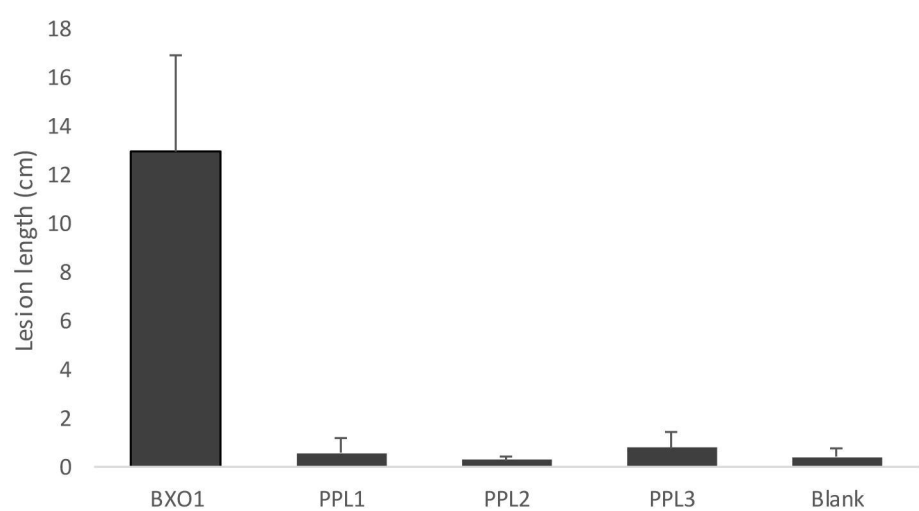

(B)

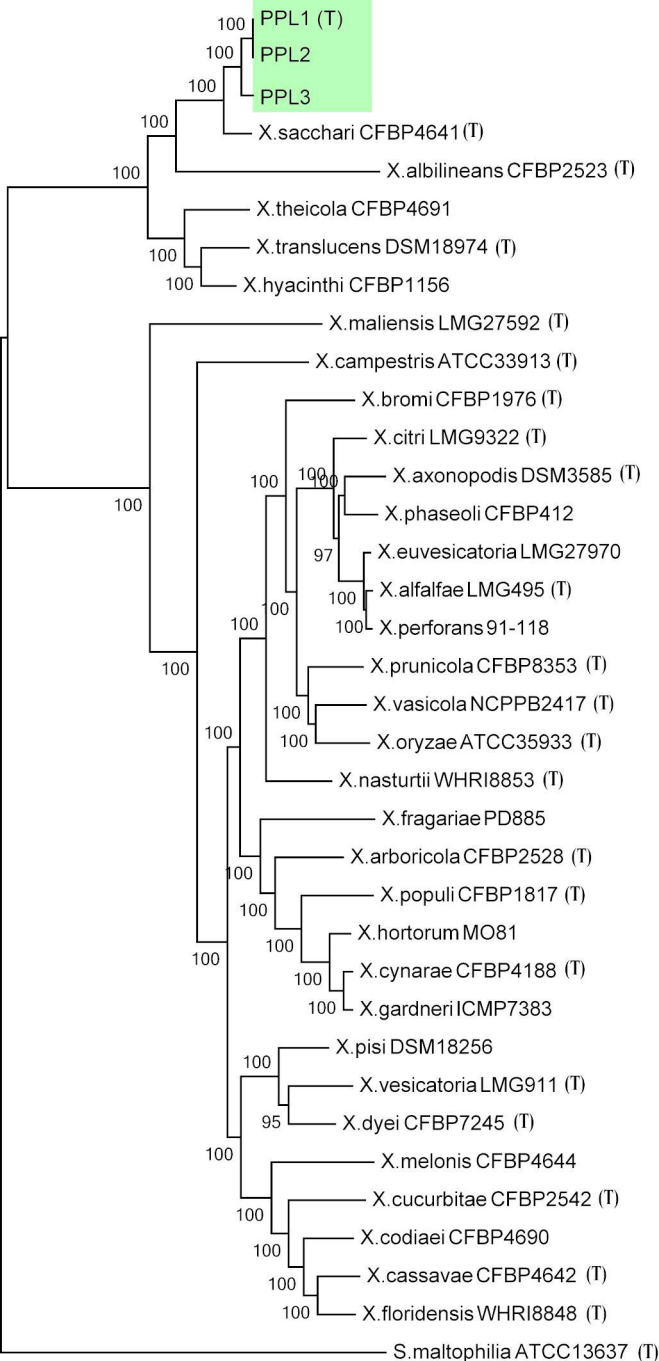

0.050



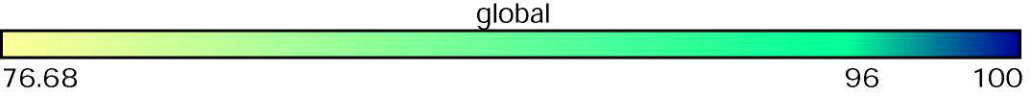

| S. maltophilia ATCC13637 (T) | PPL1 (T) | PPL2 | PPL3 | X.sacchari CFBP4641 (T) | X.hyacinthi CFBP1156 | X.translucens DSM18974 (T) | X.theicola CFBP4691 | X.albilineans CFBP2523 (T) | X.campestris ATCC33913 (T) | X.vesicatoria LMG911 (T) | X.pisi DSM18256 | X.dyei CFBP7245 (T) | X.codiaei CFBP4690 | X.floridensis WHRI8848 (T) | X.cassavae CFBP4642 (T) | X.cucurbitae CFBP2542 (T) | X.melonis CFBP4644 | X.fragariae PD885 | X.arboricola CFBP2528 (T) | X.hortorum MO81 | X.cynarae CFBP4188 (T) | X.gardneri ICMP7383 | X.populi CFBP1817 (T) | X.citri LMG9322 (T) | X.phaseoli CFBP412 | X.euvesicatoria LMG27970 | X.perforans 91-118 | X.alfalfae LMG495 (T) | X.axonopodis DSM3585 (T) | X.bromi CFBP1976 (T) | X.vasicola NCPPB2717 (T) | X.oryzae ATCC35933 (T) | X.prunicola CFBP8353 (T) | X.nasturtii WHRI8853 (T) | X.maliensis LMG27592 (T) |
|------------------------------|----------|------|------|-------------------------|----------------------|----------------------------|---------------------|----------------------------|----------------------------|--------------------------|-----------------|---------------------|--------------------|----------------------------|-------------------------|---------------------------|--------------------|-------------------|---------------------------|-----------------|------------------------|---------------------|-----------------------|---------------------|--------------------|--------------------------|--------------------|-----------------------|--------------------------|----------------------|--------------------------|------------------------|--------------------------|--------------------------|--------------------------|
|------------------------------|----------|------|------|-------------------------|----------------------|----------------------------|---------------------|----------------------------|----------------------------|--------------------------|-----------------|---------------------|--------------------|----------------------------|-------------------------|---------------------------|--------------------|-------------------|---------------------------|-----------------|------------------------|---------------------|-----------------------|---------------------|--------------------|--------------------------|--------------------|-----------------------|--------------------------|----------------------|--------------------------|------------------------|--------------------------|--------------------------|--------------------------|

|       |       |       |       |       |       |       |       |       |       |       |       |       |       |       |       |       |       |       |       |       |       |       |       |       |       |       |       |       |       |       |       |       |       |       |       |
|-------|-------|-------|-------|-------|-------|-------|-------|-------|-------|-------|-------|-------|-------|-------|-------|-------|-------|-------|-------|-------|-------|-------|-------|-------|-------|-------|-------|-------|-------|-------|-------|-------|-------|-------|-------|
| 100   | 79.17 | 79.21 | 79.04 | 79.05 | 79.07 | 79.22 | 78.89 | 76.68 | 77.76 | 77.06 | 77.6  | 77.19 | 78.1  | 77.33 | 77.69 | 77.59 | 77.65 | 76.69 | 77.63 | 77.05 | 77.24 | 77.53 | 77.14 | 77.16 | 77.25 | 77.37 | 77.32 | 77.34 | 77.28 | 77.19 | 76.71 | 77.11 | 77.25 | 77.63 | 77.16 |
| 79.17 | 100   | 99.95 | 97.6  | 94.14 | 87.68 | 87.03 | 86.99 | 84.33 | 79.42 | 79.1  | 79.14 | 79.21 | 79.94 | 79.63 | 79.79 | 79.88 | 79.76 | 78.67 | 79.98 | 79.16 | 79.32 | 79.27 | 78.97 | 79.16 | 79.11 | 79.27 | 79.26 | 79.32 | 78.88 | 79.05 | 78.6  | 78.9  | 78.98 | 79.22 | 79.75 |
| 79.21 | 99.95 | 100   | 97.66 | 94.23 | 87.55 | 87.02 | 86.8  | 84.49 | 79.48 | 79.15 | 79.41 | 79.17 | 80.11 | 79.76 | 79.67 | 79.56 | 79.79 | 78.63 | 79.97 | 79.27 | 79.39 | 79.33 | 79.02 | 79.13 | 79.3  | 79.28 | 79.34 | 79.21 | 79.14 | 78.65 | 78.9  | 79.02 | 79.4  | 79.65 |       |
| 79.04 | 97.6  | 97.66 | 100   | 94.14 | 87.6  | 87.14 | 87.05 | 84.43 | 79.35 | 79    | 79.47 | 79.22 | 80.15 | 79.65 | 79.76 | 79.76 | 79.7  | 78.55 | 79.85 | 79.32 | 79.39 | 79.28 | 79.03 | 79.1  | 79.15 | 79.33 | 79.43 | 79.35 | 79.06 | 79.15 | 78.56 | 78.89 | 78.87 | 79.32 | 79.56 |
| 79.05 | 94.14 | 94.23 | 94.14 | 100   | 87.65 | 87.21 | 86.84 | 84.16 | 79.34 | 78.96 | 79.31 | 79.18 | 79.84 | 79.58 | 79.69 | 79.56 | 79.91 | 78.64 | 79.95 | 79.17 | 79.13 | 79.21 | 78.77 | 79.06 | 79.26 | 79.19 | 79.27 | 79.42 | 79    | 78.92 | 78.72 | 78.69 | 78.89 | 79.41 | 79.61 |
| 79.07 | 87.68 | 87.55 | 87.6  | 87.65 | 100   | 92.53 | 90.68 | 83.69 | 79.84 | 79.52 | 79.83 | 79.6  | 80.38 | 80.08 | 80.05 | 79.86 | 79.88 | 78.78 | 80.38 | 79.75 | 79.88 | 79.71 | 79.12 | 79.42 | 79.49 | 79.31 | 79.41 | 79.67 | 79.33 | 79.42 | 79.05 | 79.13 | 79.18 | 79.72 | 79.65 |
| 79.22 | 87.03 | 87.02 | 87.14 | 87.21 | 92.53 | 100   | 90.13 | 83.61 | 79.82 | 79.69 | 79.75 | 79.72 | 80.41 | 79.98 | 80.05 | 79.79 | 80.19 | 78.81 | 80.38 | 79.74 | 79.8  | 79.74 | 79.45 | 79.4  | 79.56 | 79.7  | 79.69 | 79.63 | 79.56 | 79.59 | 79.24 | 79.42 | 79.44 | 79.77 | 79.71 |
| 78.89 | 86.99 | 86.8  | 87.05 | 86.84 | 90.68 | 90.13 | 100   | 83.31 | 79.55 | 79.27 | 79.58 | 79.52 | 80.11 | 79.62 | 79.74 | 79.6  | 79.96 | 78.48 | 79.99 | 79.21 | 79.44 | 79.28 | 78.84 | 79.26 | 79.33 | 79.28 | 79.4  | 79.59 | 79.27 | 79.22 | 78.6  | 79.08 | 79.09 | 79.4  | 79.48 |
| 76.68 | 84.33 | 84.49 | 84.43 | 84.16 | 83.69 | 83.61 | 83.31 | 100   | 77.41 | 77.22 | 77.63 | 77.51 | 77.71 | 77.48 | 77.53 | 76.98 | 77.79 | 76.78 | 77.7  | 77.05 | 77.43 | 77.28 | 76.73 | 77.23 | 77.22 | 77.09 | 77.26 | 77.5  | 77.04 | 77    | 76.94 | 77.29 | 76.9  | 77.18 | 77.48 |
| 77.76 | 79.42 | 79.48 | 79.35 | 79.34 | 79.84 | 79.82 | 79.55 | 77.41 | 100   | 84.99 | 85.5  | 85.42 | 85.51 | 85.49 | 85.59 | 85.16 | 84.97 | 84.92 | 86.11 | 85.53 | 85.81 | 85.84 | 84.97 | 85.09 | 85.07 | 85.19 | 85.2  | 85.2  | 84.92 | 85.06 | 84.89 | 84.74 | 84.89 | 85.53 | 82.66 |
| 77.06 | 79.1  | 79.15 | 79    | 78.96 | 79.52 | 79.69 | 79.27 | 77.22 | 84.99 | 100   | 90.29 | 90.61 | 87.18 | 87.9  | 87.56 | 86.56 | 86.02 | 85.64 | 86.73 | 86.51 | 86.18 | 86.25 | 85.62 | 86.22 | 85.94 | 86.18 | 86.07 | 86.17 | 85.74 | 86.78 | 85.91 | 85.79 | 86.18 | 87.36 | 82.37 |
| 77.6  | 79.14 | 79.41 | 79.47 | 79.31 | 79.83 | 79.75 | 79.58 | 77.63 | 85.5  | 90.29 | 100   | 91.34 | 87.39 | 88.96 | 87.61 | 86.94 | 86.47 | 86.01 | 87.78 | 87.09 | 86.78 | 86.97 | 86.19 | 86.47 | 86.35 | 86.46 | 86.5  | 86.54 | 86.17 | 86.85 | 86.11 | 86.13 | 87.58 | 87.38 | 82.56 |
| 77.19 | 79.21 | 79.17 | 79.22 | 79.18 | 79.6  | 79.72 | 79.52 | 77.51 | 85.42 | 90.61 | 91.34 | 100   | 87.13 | 88.05 | 87.36 | 86.5  | 86.17 | 85.96 | 86.92 | 86.68 | 86.6  | 86.74 | 85.98 | 86.27 | 86.21 | 86.22 | 86.18 | 86.25 | 85.85 | 86.81 | 86    | 85.93 | 86.49 | 87.41 | 82.4  |
| 78.1  | 79.94 | 80.11 | 80.15 | 79.84 | 80.38 | 80.41 | 80.11 | 77.71 | 85.51 | 87.18 | 87.39 | 87.13 | 100   | 91.55 | 91.68 | 89.55 | 88.15 | 85.56 | 86.71 | 86.08 | 86.15 | 86.18 | 85.61 | 86.3  | 86.47 | 86.38 | 86.36 | 86.46 | 86.06 | 86.43 | 85.85 | 86.18 | 86.05 | 86.88 | 82.99 |
| 77.33 | 79.63 | 79.76 | 79.65 | 79.58 | 80.08 | 79.98 | 79.62 | 77.48 | 85.49 | 87.9  | 88.96 | 88.05 | 91.55 | 100   | 93.2  | 89.54 | 87.9  | 85.59 | 87.14 | 86.45 | 86.29 | 86.4  | 85.76 | 86.49 | 86.53 | 86.57 | 86.45 | 86.52 | 86.15 | 86.84 | 85.97 | 86.05 | 86.39 | 87.16 | 83.02 |
| 77.69 | 79.79 | 79.67 | 79.76 | 79.69 | 80.05 | 80.05 | 79.74 | 77.53 | 85.59 | 87.56 | 87.61 | 87.36 | 91.68 | 93.2  | 100   | 89.5  | 87.76 | 85.68 | 87.54 | 86.46 | 86.49 | 86.56 | 85.78 | 86.62 | 86.72 | 86.84 | 86.89 | 87.03 | 86.41 | 86.81 | 86.18 | 86.24 | 86.39 | 87.21 | 82.85 |
| 77.59 | 79.88 | 79.56 | 79.76 | 79.56 | 79.86 | 79.79 | 79.6  | 76.98 | 85.16 | 86.56 | 86.94 | 86.5  | 89.55 | 89.54 | 89.5  | 100   | 87.82 | 84.87 | 86.3  | 85.62 | 85.51 | 85.65 | 84.94 | 85.8  | 85.9  | 85.89 | 85.87 | 86.04 | 85.49 | 85.87 | 85.39 | 85.4  | 85.55 | 86.24 | 82.74 |
| 77.65 | 79.76 | 79.79 | 79.7  | 79.91 | 79.88 | 80.19 | 79.96 | 77.79 | 84.97 | 86.02 | 86.47 | 86.17 | 88.15 | 87.9  | 87.76 | 87.82 | 100   | 84.88 | 86.23 | 85.5  | 85.48 | 85.54 | 84.89 | 85.76 | 85.76 | 85.93 | 85.81 | 85.89 | 85.46 | 85.7  | 85.39 | 85.45 | 85.52 | 86    | 82.67 |
| 76.69 | 78.67 | 78.63 | 78.55 | 78.64 | 78.78 | 78.81 | 78.48 | 76.78 | 84.92 | 85.64 | 86.01 | 85.96 | 85.56 | 85.59 | 85.68 | 84.87 | 84.88 | 100   | 87.4  | 87.37 | 87.37 | 87.47 | 87.12 | 85.92 | 85.87 | 85.88 | 85.97 | 86.05 | 85.72 | 86.09 | 85.95 | 85.93 | 85.89 | 86.67 | 82    |
| 77.63 | 79.98 | 79.97 | 79.85 | 79.95 | 80.38 | 80.38 | 79.99 | 77.7  | 86.11 | 86.73 | 87.78 | 86.92 | 86.71 | 87.14 | 87.54 | 86.3  | 86.23 | 87.4  | 100   | 89.49 | 89.53 | 89.5  | 88.52 | 87.06 | 86.94 | 87.02 | 87.03 | 86.98 | 86.58 | 86.9  | 86.76 | 86.64 | 87.1  | 87.68 | 83.23 |
| 77.05 | 79.16 | 79.27 | 79.32 | 79.17 | 79.75 | 79.74 | 79.21 | 77.05 | 85.53 | 86.51 | 87.09 | 86.68 | 86.08 | 86.45 | 86.46 | 85.62 | 85.5  | 87.37 | 89.49 | 100   | 95.87 | 95.75 | 90.71 | 86.54 | 86.37 | 86.45 | 86.47 | 86.67 | 86.17 | 86.58 | 86.42 | 86.47 | 86.44 | 87.56 | 82.41 |
| 77.24 | 79.32 | 79.39 | 79.39 | 79.13 | 79.88 | 79.8  | 79.44 | 77.43 | 85.81 | 86.18 | 86.78 | 86.6  | 86.15 | 86.29 | 86.49 | 85.51 | 85.48 | 87.37 | 89.53 | 95.87 | 100   | 98.31 | 90.71 | 86.58 | 86.37 | 86.59 | 86.38 | 86.62 | 86.13 | 86.55 | 86.43 | 86.42 | 86.39 | 87.45 | 82.52 |
| 77.53 | 79.27 | 79.33 | 79.28 | 79.21 | 79.71 | 79.74 | 79.28 | 77.28 | 85.84 | 86.25 | 86.97 | 86.74 | 86.18 | 86.4  | 86.56 | 85.65 | 85.54 | 87.47 | 89.5  | 95.75 | 98.31 | 100   | 90.78 | 86.59 | 86.4  | 86.63 | 86.54 | 86.62 | 86.19 | 86.57 | 86.36 | 86.33 | 86.58 | 87.45 | 82.49 |
| 77.14 | 79.16 | 79.13 | 79.1  | 79.06 | 79.42 | 79.4  | 79.26 | 77.23 | 84.97 | 85.62 | 86.19 | 85.98 | 85.61 | 85.76 | 85.78 | 84.94 | 84.89 | 87.12 | 88.52 | 90.71 | 90.71 | 90.78 | 100   | 85.9  | 85.83 | 85.85 | 85.92 | 85.91 | 85.69 | 85.85 | 85.87 | 85.73 | 85.82 | 86.57 | 82.06 |
| 77.16 | 79.16 | 79.13 | 79.1  | 79.06 | 79.42 | 79.4  | 79.26 | 77.23 | 85.09 | 86.22 | 86.47 | 86.27 | 86.3  | 86.49 | 86.62 | 85.8  | 85.76 | 85.92 | 87.06 | 86.54 | 86.58 | 86.59 | 85.9  | 100   | 93.67 | 94.04 | 94.28 | 94.14 | 93.07 | 89.32 | 89.91 | 89.93 | 89.81 | 88.83 | 82.61 |
| 77.25 | 79.11 | 79.3  | 79.15 | 79.26 | 79.49 | 79.56 | 79.33 | 77.22 | 85.07 | 85.94 | 86.35 | 86.21 | 86.47 | 86.53 | 86.72 | 85.9  | 85.76 | 85.87 | 86.94 | 86.37 | 86.37 | 86.4  | 85.83 | 93.67 | 100   | 94.14 | 94.06 | 94.11 | 93.16 | 89.15 | 89.52 | 89.65 | 89.58 | 88.63 | 82.78 |
| 77.37 | 79.27 | 79.28 | 79.33 | 79.19 | 79.31 | 79.7  | 79.28 | 77.09 | 85.19 | 86.18 | 86.46 | 86.22 | 86.38 | 86.57 | 86.84 | 85.89 | 85.93 | 85.88 | 87.02 | 86.45 | 86.59 | 86.63 | 85.85 | 94.04 | 94.14 | 100   | 98.58 | 98.54 | 92.96 | 89.26 | 90.15 | 90.07 | 89.77 | 88.73 | 82.89 |
| 77.32 | 79.26 | 79.34 | 79.43 | 79.27 | 79.41 | 79.69 | 79.4  | 77.26 | 85.2  | 86.07 | 86.5  | 86.18 | 86.36 | 86.45 | 86.89 | 85.87 | 85.81 | 85.97 | 87.03 | 86.47 | 86.38 | 86.54 | 85.92 | 94.28 | 94.06 | 98.58 | 100   | 98.78 | 93.07 | 89.15 | 90.06 | 90.08 | 89.76 | 88.82 | 82.89 |
| 77.34 | 79.32 | 79.21 | 79.35 | 79.42 | 79.67 | 79.63 | 79.59 | 77.5  | 85.2  | 86.17 | 86.54 | 86.25 | 86.46 | 86.52 | 87.03 | 86.04 | 85.89 | 86.05 | 86.98 | 86.67 | 86.62 | 86.62 | 85.91 | 94.14 | 94.11 | 98.54 | 98.78 | 100   | 93.17 | 89.33 | 90.06 | 90.09 | 89.85 | 88.99 | 82.96 |
| 77.28 | 78.88 | 79.14 | 79.06 | 79    | 79.33 | 79.56 | 79.27 | 77.04 | 84.92 | 85.74 | 86.17 | 85.85 | 86.06 | 86.15 | 86.41 | 85.49 | 85.46 | 85.72 | 86.58 | 86.17 | 86.13 | 86.19 | 85.69 | 93.07 | 93.16 | 92.96 | 93.07 | 93.17 | 100   | 89.31 | 89.64 | 89.64 | 89.43 | 88.58 | 82.77 |
| 77.19 | 79.05 | 79.14 | 79.15 | 78.92 | 79.42 | 79.59 | 79.22 | 77    | 85.06 | 86.78 | 86.85 | 86.81 | 86.43 | 86.84 | 86.81 | 85.87 | 85.7  | 86.09 | 86.9  | 86.58 | 86.55 | 86.57 | 85.85 | 89.32 | 89.15 | 89.26 | 89.15 | 89.33 | 89.31 | 100   | 89.52 | 89.43 | 89.61 | 88.93 | 82.36 |
| 76.71 | 78.6  | 78.65 | 78.56 | 78.72 | 79.05 | 79.24 | 78.6  | 76.94 | 84.89 | 85.91 | 86.11 | 86    | 85.85 | 85.97 | 86.18 | 85.39 | 85.39 | 85.95 | 86.76 | 86.42 | 86.43 | 86.36 | 85.87 | 89.91 | 89.52 | 90.15 | 90.06 | 90.06 | 89.64 | 89.52 | 100   | 91.3  | 91.11 | 88.78 | 82.34 |
| 77.11 | 78.9  | 78.9  | 78.89 | 78.69 | 79.13 | 79.42 | 79.08 | 77.29 | 84.74 | 85.79 | 86.13 | 85.93 | 86.18 | 86.05 | 86.24 |       |       |       |       |       |       |       |       |       |       |       |       |       |       |       |       |       |       |       |       |
